# Supplementary material for: Efficient Neuroprotective Rescue of Sacsin-Related Disease Phenotypes in Zebrafish
Source: Int J Mol Sci. 2021 Aug 5;22(16):8401. doi: 10.3390/ijms22168401 (PMC8395086; doi:10.3390/ijms22168401)
Supplement: Supplementary file 1 [file ijms-22-08401-s001.zip]

Archive with 5 entries (5 files):
- Supplem Fig.S1.tif
- Supplem Fig.S2.tif
- Supplem. Fig.S3.tif
- Supplementary material revision.pdf
- Supplementary Video Snapshot of tracking.JPG
